# Supplementary material
Source: publisher site journal article supplement (https://www.dovepress.com/article/143066)
Supplement: Supplementary file 1 [file get_supplementary_file.php]

## Supplementary File

### Full search terms

- 1 (Alpha adj2 anti adj2 deficien\$).tw.
- 2 A1AT.mp.
- 3 A1AT.ti,ab.
- 4 A1ATD.tw.
- 5 AAT.mp.
- 6 AAT.ti,ab.
- 7 AATD.mp.
- 8 AATD.ti,ab.
- 9 alfa 1 antitrypsin.ti,ab.
- 10 alpha 1 antitrypsin.ti,ab.
- 11 Alpha 1-Antitrypsin.mp.
- 12 Alpha 1-Antitrypsin Deficiency.mp.
- 13 (Alpha adj2 anti trypsin).mp. [mp=title, abstract, heading word, drug trade name, original title, device manufacturer, drug manufacturer, device trade name, keyword]
- 14 alpha one antitrypsin.ti,ab.
- 15 alpha one-antitrypsin.ti,ab.
- 16 alpha1 antitrypsin.ti,ab.
- 17 alpha-1 antitrypsin.ti,ab.
- 18 alpha1-antitrypsin.mp. or alpha 1 antitrypsin/
- 19 alpha1-antitrypsin deficiency.mp.
- 20 alpha-1-antitrypsin.ti,ab.
- 21 alpha-1-at.ti,ab.
- 22 exp alpha 1 antitrypsin deficiency/
- 23 exp Bronchitis/
- 24 exp Pulmonary Disease, Chronic Obstructive/
- 25 chronic obstructive airway\* disease.mp.
- 26 Chronic bronchitis.mp. or chronic bronchitis/
- 27 chronic obstructive pulmonary disease.mp.
- 28 chronic respiratory disorder.mp.
- 29 COPD.mp.
- 30 chronic obstructive lung disease/
- 31 deficien\$.mp. or lack\$.ti,ab. [mp=title, abstract, heading word, drug trade name, original title, device manufacturer, drug manufacturer, device trade name, keyword]
- 32 Smoking-related lung disease\*\$.mp.
- 33 Emphysema.mp. or emphysema/
- 34 Computed Tomography.mp.
- 35 Computerised axial tomography.mp.
- 36 Computerised axial tomography.mp.
- 37 computer assisted tomography/

- 38 ct.mp.
- 39 Tomography, X-Ray Computed.mp.
- 40 X-Ray computed.mp.
- 41 Lung density.mp.
- 42 Densitomet\*.mp.
- 43 Lung attenuation.mp.
- 44 Lung densitometry.mp.
- 45 Lung function test/ or lung function/ or spirometry/ or forced expiratory volume/ or FEV1.mp.
- 46 Pulmonary function.mp.
- 47 Lung Volume Measurements.mp.
- 48 All alpha 1 terms. 1 or 2 or 3 or 4 or 5 or 6 or 7 or 8 or 9 or 10 or 11 or 12 or 13 or 14 or 15 or 16 or 17 or 18 or 19 or 20 or 21 or 22
- 49 (excluding 31): all COPD terms: 23 or 24 or 25 or 26 or 27 or 28 or 29 or 30 or 32 or 33
- 50 All CT and CT densitometry terms: 34 or 35 or 36 or 37 or 38 or 39 or 40 or 41 or 42 or 43 or 44
- 51 Lung function terms: 45 or 46 or 47
- 52 alpha one AND CT: 48 and 50
- 53 alpha one AND CT and lung function: 48 and 50 and 51
- 54 COPD AND CT: 49 and 50
- 55 COPD AND CT AND lung function: 49 and 50 and 51
- 56 Sum of all COPD terms and CT/densitometry terms: 48 or 49
- 57 COPD OR alpha one AND CT: 50 and 56
- 58 COPD OR alpha one AND CT AND lung function: 51 and 57
- 59 Sum of 52 or 53 or 54 or 55 or 57 or 58
- 60 limit 59 to (human and (embase or medline) and (adolescent <13 to 17 years> or adult <18 to 64 years> or aged <65+ years>)

### Full inclusion and exclusion criteria

#### Inclusion

- COPD/AATD and any reference linking lung density to clinical outcomes.

#### Exclusion

- Case study or studies with participant number less than 8.
- Surgical studies (i.e. those reporting density before and after surgical intervention)
- Other medical specialities
- Lab or animal based studies
- Paediatric studies
- Studies relating only to lung measurements including density with no clinical application.

Table S1. Risk of bias tool used in the systematic review

| <b>Patient Selection</b>        |                                                                                                                                                     |
|---------------------------------|-----------------------------------------------------------------------------------------------------------------------------------------------------|
| Source                          | How well defined was the source of information (survey, record review)                                                                              |
| Inclusion/Exclusion             | List inclusion and exclusion criteria for exposed and unexposed subjects?                                                                           |
| Patient Selection               | Was a consecutive or random sample of patients enrolled?                                                                                            |
| Applicability                   | Adequate representativeness of the sample: do they reflect all COPD/AATD patients rather than just one end of the spectrum e.g. NETT trial and LVRS |
| Duration of Study               | Indicate time period used for identifying patients                                                                                                  |
| <b>Index and Reference Test</b> |                                                                                                                                                     |
| Blinding                        | Indicate if evaluators of subjective components of study were masked to other aspects of the status of the participants:                            |
| CT bias                         | Could conduct or interpretation of CT density have introduced bias? Was CT density measurement reliable                                             |
| PFT Bias                        | Could conduct or interpretation of PFTs introduced bias: Was it done post-bronchodilator                                                            |
| Quality assurance               | Was a phantom used or calibration performed?                                                                                                        |
| <b>Flow and Timing</b>          |                                                                                                                                                     |
| Flow and Timing                 | Was there an appropriate interval between the CT study and PFTs (within a year of each other?)                                                      |
| <b>Reporting</b>                |                                                                                                                                                     |
| Confounding variables           | Description of how confounding was assessed and/or controlled                                                                                       |

|                     |                                                                      |
|---------------------|----------------------------------------------------------------------|
| Missing variables   | If applicable, explain how missing data were handled in the analysis |
| Statistical methods | Adequate description of statistical methods and why.                 |

Table S2. Summary of studies which subdivide the correlation between CT density (-950HU) and FEV<sub>1</sub>/FVC into individual lobes.

| <b>Lobe</b> | <b>Pooled correlation coefficient</b> | <b>95% CI</b>  | <b>I<sup>2</sup> (%)</b> | <b>X<sup>2</sup></b> | <b>p</b> |
|-------------|---------------------------------------|----------------|--------------------------|----------------------|----------|
| LLL         | -0.70                                 | -0.83 to -0.57 | 86.20                    | 10.00                | 0.0067   |
| LUL         | -0.33                                 | -0.62 to -0.04 | 87.80                    | 15.55                | 0.0004   |
| RUL         | -0.38                                 | -0.56 to -0.20 | 71.20                    | 6.60611              | 0.0368   |
| RML         | -0.33                                 | -0.52 to -0.14 | 70.10                    | 6.32                 | 0.0424   |
| RLL         | -0.62                                 | -0.69 to -0.54 | 20.80                    | 2.21                 | 0.3314   |

Table S3. Baseline Characteristics Table

| Author,<br>Year                        | Participants<br>(%male) | Age<br>Mean<br>(SD) | Baseline<br>FEV <sub>1</sub> %<br>Mean<br>(SD) | Baseline<br>DLCO<br>% Mean<br>(SD) | %LAA<br>(HU) | Statistical<br>methods     | Reconstruction<br>Algorithm | Software                | Slice<br>thickness               | Recruitment<br>procedures used                                                                                     |
|----------------------------------------|-------------------------|---------------------|------------------------------------------------|------------------------------------|--------------|----------------------------|-----------------------------|-------------------------|----------------------------------|--------------------------------------------------------------------------------------------------------------------|
| Agusti, A. et<br>al, 2010 <sup>1</sup> | 2164 (48)               | 63.4<br>(7.1)       |                                                |                                    | -950HU       |                            |                             |                         | low dose<br>CT; 1mm<br>thickness | From OPAs in<br>participating<br>hospitals.<br>Smokers/non-<br>smokers from site<br>databases and<br>local papers. |
| Akira et al,<br>2009 <sup>2</sup>      | 67(55)                  | 70.7<br>(9.3)       | 24.4 (3.9)                                     |                                    | -950HU       | Correlation<br>coefficient | not mentioned               | Advantage<br>Windows 3D | 1.25mm                           | usual care                                                                                                         |
| Alberti, P. et<br>al 2012 <sup>3</sup> | 1831 (66)               | 63.4(7.0)           |                                                |                                    | -950HU       |                            |                             |                         | low dose<br>CT                   | Via ECLIPSE: 3<br>year prospective<br>non-interventional<br>study in 12                                            |

|                                         |          |                |             |                |        |                                                            |                                         |                                                                                                 |        | countries                     |
|-----------------------------------------|----------|----------------|-------------|----------------|--------|------------------------------------------------------------|-----------------------------------------|-------------------------------------------------------------------------------------------------|--------|-------------------------------|
| Atta et al,<br>2015 <sup>4</sup>        | 63(58.7) | 53 (8.9)       | 29.8 (18.4) |                | -950HU | Correlation<br>coefficient                                 | standard<br>reconstruction<br>algorithm | thoracic VCAR                                                                                   | 5mm    | usual care                    |
| Aziz, Z. A.<br>et al, 2005 <sup>5</sup> | 101 (65) | 61 (26-<br>86) | 42.2 (26.7) | 48.1<br>(20.8) | -950HU | Multivariate<br>analysis and<br>correlation<br>coefficient | high spatial<br>resolution<br>algorithm | not mentioned                                                                                   | 1-3mm  | identified<br>retrospectively |
| Baldi et al,<br>2001 <sup>6</sup>       | 24 (75)  | 61 (11)        | 35 (12)     |                | -950HU | Correlation<br>coefficient                                 | bone algorithm                          | program<br>developed at the<br>research service<br>branch of<br>National institute<br>of health | 1mm    | usual care                    |
| Barjaktarevi<br>c, I. et al             | 460(57)  | 64.2           | 30.6 (8)    |                | -950HU | Correlation                                                | B35f                                    | Pulmonary                                                                                       | 1.25mm | usual care                    |

|                                            |           |          |          |         |                |                         |                 |                       |                  |            |
|--------------------------------------------|-----------|----------|----------|---------|----------------|-------------------------|-----------------|-----------------------|------------------|------------|
| 2015 <sup>7</sup>                          |           | (6.8)    |          |         |                | coefficient             |                 | Workstation           |                  |            |
| Bastarrika, G. et al, 2009 <sup>8</sup>    | 102 (80)  | 55 (7.5) | 103 (23) |         | -950HU         | Correlation coefficient | B30f            |                       | 5mm              | usual care |
| Bernspang, E. et al, 2011 <sup>9</sup>     | 19 (61)   | 32       | 108(12)  | 92 (11) | PD15           | Correlation coefficient | B10f            | Pulmo                 | 5mm              |            |
| Camiciottoli, G. et al, 2006 <sup>10</sup> | 51 (90)   | 64       | 52 (20)  | 68 (24) | -950HU         | Correlation coefficient | High resolution | Pulmo                 | 1mm              | usual care |
| Camiciottoli, G. et al, 2012 <sup>11</sup> | 72 (73)   | 66 (8)   |          |         |                |                         |                 |                       | 5mm              |            |
| Castaldi, P. J. et al, 2013 <sup>12</sup>  | 9313 (54) | 60 (9)   | 77 (25)  |         | -910HU, -950HU | Multivariate analysis   | B31f            | Pulmonary Workstation | 0.625, 0.75, 0.9 | COPDGene   |

|                                               |            |                 |                  |                |        |                                 |                       |                                 |                             |                                     |
|-----------------------------------------------|------------|-----------------|------------------|----------------|--------|---------------------------------|-----------------------|---------------------------------|-----------------------------|-------------------------------------|
| Chae et al,<br>2010 <sup>13</sup>             | 59(98)     | 65.71<br>(6.56) | 45.79<br>(17.84) |                | -950HU | Correlation<br>coefficient      | B30                   | MATLAB and in<br>house software | 0.5-<br>0.75mm              | KOLD Cohort                         |
| Chapman, K.<br>R. et al 2015<br><sup>14</sup> | 180 (54%)  | 53 (7)          | 43.3 (11.6)      |                | PD15   | mixed effects<br>model and mITT | not mentioned         | Pulmo                           | not<br>mentioned            | 28 study centres in<br>13 countries |
| Chen et al,<br>2014 <sup>15</sup>             | 146 (83.6) | 65              |                  |                | -950HU | Correlation<br>coefficient      | not mentioned         | LungCAD                         | 1mm                         | usual care                          |
| Cheng et al,<br>2015 <sup>16</sup>            | 103 (84)   | 75.8<br>(9.8)   | 44.77<br>(13.8)  |                | -950HU | Logistic regression             | Standard<br>algorithm | Myrian                          | 1.25mm                      | Usual care                          |
| Chierakul,<br>N. et al,<br>2014 <sup>17</sup> | 23(82)     | 73 (8)          | 67.8 (25.4)      | 56 (28.1)      | -950HU | Correlation<br>coefficient      | not mentioned         | Thoracic VCAR                   | not<br>mentioned            | usual care                          |
| Coxson, H.<br>O. et al,<br>2013 <sup>18</sup> | 2161 (64)  | 63.4<br>(7.1)   | 30.6 (8)         | 36.7<br>(13.1) | -950HU |                                 |                       |                                 | 1 or<br>1.25mm<br>thickness | ECLIPSE                             |



|                                            |            |            |             |              |        |                         |               |               |     |            |
|--------------------------------------------|------------|------------|-------------|--------------|--------|-------------------------|---------------|---------------|-----|------------|
| Crim, C. et al, 2011 <sup>19</sup>         | 2054 (65)  | 63.4 (7.1) |             |              | -950HU |                         |               |               | 1mm | ECLIPSE    |
| Dawkins, P. et al, 2009 <sup>20</sup>      | 488 (60)   | 50 (0.48)  | 55.99 (1.4) |              | -910HU | Hazard Ratio            |               |               | 1mm | ADAPT      |
| De Torres, J. P. et al, 2011 <sup>21</sup> | 115 (84)   | 64 (10)    | 75 (15)     | 73 (20)      | -960HU | Correlation coefficient | B40f          | Leonardo      | 1mm | usual care |
| Desai et al, 2007 <sup>22</sup>            | 106 (66.9) | 61         | 42.4 (26.7) | 48.1 (20.8)  | -950HU | Correlation coefficient | not mentioned | MagicView     | 1mm | usual care |
| Diaz et al, 2009 <sup>23</sup>             | 27 (33)    | 55 (12)    | 50 (10)     | 55 (16)      | -950HU | Correlation coefficient | B10f          | Pulmo         | 5mm | usual care |
| Diaz, A. A et al, 2015 <sup>24</sup>       | 102 (60)   | 66 (8.8)   | 68 (23.8)   | 71.5 (21.6)% | -960HU | MCID and C-statistic    | B45f          | not mentioned | 1mm | PELE       |
| Diaz, A. A.                                | 109 (56)   | 61.2       |             |              | -950HU |                         |               |               |     | COPDGene   |

|                                              |           |               |             |          |        |                                                                        |                                         |                      |                  |                                               |
|----------------------------------------------|-----------|---------------|-------------|----------|--------|------------------------------------------------------------------------|-----------------------------------------|----------------------|------------------|-----------------------------------------------|
| et al 2010 <sup>25</sup>                     |           | (7.9)         |             |          |        |                                                                        |                                         |                      |                  |                                               |
| Diaz, A. A.<br>et al, 2010 <sup>26</sup>     | 93 (57)   | 66.7<br>(8.8) | 57.1 (24.3) |          | -950HU | Correlation<br>coefficient and<br>multivariate linear<br>regression    | B46f                                    | Airway inspector     | 1mm              | LTRC                                          |
| Diaz, A. A.<br>et al, 2012 <sup>27</sup>     | 71 (45)   | 64.7 (10)     | 89 (7.5)    | 109 (22) | -960HU |                                                                        |                                         |                      | not<br>mentioned | From COPD<br>longitudinal study<br>(PELE)     |
| Diaz, A. A.<br>et al, 2013 <sup>28</sup>     | 2500      | 64 (8)        | 59 (23)     |          | -950HU |                                                                        |                                         |                      | 0.75mm           | COPDGene                                      |
| Dijkstra, A.<br>E. et al, 2013 <sup>29</sup> | 492 (100) | 59.4<br>(5.2) | 98.2 (19.7) |          | PD15   | Multivariate<br>analysis                                               | soft<br>reconstruction<br>filter (B30f) | in house<br>software | 1mm              | NELSON                                        |
| Dirksen, A.<br>et al 1999 <sup>30</sup>      | 56 (61%)  | 47.6 (3)      | 48 (2.8)    | 60 (3)   | PD15   | random effects<br>regression model,<br>slope analysis and<br>Pearson's | <5/10mm                                 | not mentioned        | 8mm              | alpha one<br>registries in<br>Netherlands and |

|                                         |          |            |                         |                         |        |                                                                                                       |               |                       |              |                                        |
|-----------------------------------------|----------|------------|-------------------------|-------------------------|--------|-------------------------------------------------------------------------------------------------------|---------------|-----------------------|--------------|----------------------------------------|
|                                         |          |            |                         |                         |        | coefficient                                                                                           |               |                       |              | Denmark                                |
| Dirksen, A. et al 2009 <sup>31</sup>    | 77 (53%) | 55 (9)     | 46.5 (20)               | 51.5 (17)               | PD15   | ITT and mITT; slope analysis tested by linear regression with statistical or physiological adjustment | B30f          | Pulmo                 | 1mm          | AATD registries Denmark, UK and Sweden |
| Dowson, L. J. et al, 2001 <sup>32</sup> | 29 (65)  | 52 (46-60) | only raw value provided | only raw value provided | -910   | correlation coefficient and multivariate linear regression                                            | not mentioned | not mentioned         | 1mm          | ADAPT                                  |
| Garfield et al, 2012 <sup>33</sup>      | 59 (46)  | 63 (9)     | 41 (18)                 |                         | -950HU | Multivariate analysis and correlation coefficient                                                     | not mentioned | pulmonary workstation | 0.75 and 5mm | usual care                             |

|                                                  |           |               |             |         |        |                                                                 |                                       |                                              |                             |            |
|--------------------------------------------------|-----------|---------------|-------------|---------|--------|-----------------------------------------------------------------|---------------------------------------|----------------------------------------------|-----------------------------|------------|
| Gevenois, P.<br>A. et al,<br>1996 <sup>34</sup>  | 37 (78.4) |               | 72 (21)     | 65 (20) | -950HU | Correlation<br>coefficient                                      | not mentioned                         | pulmo                                        | 1mm                         | usual care |
| Gevenois, P.<br>A. et al,<br>1996 <sup>35</sup>  | 59 (86.4) | 62 (8)        | 73 (20)     | 66 (17) | -950HU | Correlation<br>coefficient                                      | not mentioned                         | pulmo                                        | 1mm                         | usual care |
| Gietema, H.<br>A. et al,<br>2013 <sup>36</sup>   | 1778 (64) | 63 (7)        | 48.4 (15.7) |         | -950HU | Multiple linear<br>regression                                   |                                       |                                              | 1 or<br>1.25mm<br>thickness | ECLIPSE    |
| Grydeland,<br>T. B. et al,<br>2010 <sup>37</sup> | 463 (64)  | 65.2<br>(9.4) | 52.6 (17.4) |         | -950HU |                                                                 | Standard<br>algorithm                 | Not mentioned                                | 1mm                         | GenKOLs    |
| Han et al,<br>2011 <sup>38</sup>                 | 483 (53)  | 64 (8.5)      | 55 (22.7)   |         | -950HU | multivariate<br>analysis and<br>forward selection<br>regression | smooth<br>reconstruction<br>algorithm | VIVA<br>Pulmonary<br>Workstation<br>version2 |                             | COPDGene   |

|                                           |          |            |             |           |        |                                              |                                             |                            |             |                         |
|-------------------------------------------|----------|------------|-------------|-----------|--------|----------------------------------------------|---------------------------------------------|----------------------------|-------------|-------------------------|
| Haruna, A. et al, 2010 <sup>39</sup>      | 65 (100) | 71 (9)     | 58.8 (19.7) |           | -960HU |                                              | Lung algorithm                              | Not mentioned              | 0.5mm       | kyoto                   |
| Haruna, A. et al, 2010 <sup>40</sup>      | 251 (94) | 68.7 (7)   | 50.3 (17)   |           | -960HU | Hazard Ratio                                 | lung reconstruction algorithm               |                            | 2mm         | Kyoto university        |
| Hong, Y. et al, 2012 <sup>41</sup>        | 213 (96) | 66.3 (7.3) | 53.4 (16.5) | 74 (58.4) | -950HU | Multivariate analysis                        | standard algorithm (??)                     | in house software          | 0.625-0.8mm |                         |
| Heussel et al, 2009 <sup>42</sup>         | 102      | 64         |             |           | -950HU | Correlation coefficient                      | B40f                                        | In house YACTA software    | 1.25mm      | usual care              |
| Johannessen, A. et al, 2013 <sup>43</sup> | 947 (59) | 60 (10)    | 77 (26)     |           | -950HU | Multivariate analysis and Laplace regression | low spatial frequency algorithm for density | James Hogg iCAPTURE Centre | 1mm         | Norwegian GenKOLS study |

|                                              |            |               |             |  |        |                                                            |                                                    |                                       |                 |            |
|----------------------------------------------|------------|---------------|-------------|--|--------|------------------------------------------------------------|----------------------------------------------------|---------------------------------------|-----------------|------------|
| Jung-Wan<br>Yoo et al,<br>2011 <sup>44</sup> | 260 (96.9) | 66.2<br>(7.2) | 53.1 (16.3) |  | -950HU | Logistic regression                                        | Soft kernel (B30f)                                 | Not mentioned                         | 0.75mm          | KOLD       |
| Kim et al,<br>2010 <sup>45</sup>             | 200 (62.5) | 64.6<br>(8.4) |             |  | -950HU | Multivariate<br>analysis and<br>correlation<br>coefficient | different ones<br>used in all<br>different centres | pulmonary<br>workstation and<br>pulmo | 0.625-<br>0.9mm | COPDGene   |
| Kim et al,<br>2014 <sup>46</sup>             | 78         | 65.3<br>(8.2) | 49.6 (16.2) |  | -950HU | Correlation<br>coefficient                                 | reconstruction<br>algorithm B                      | in house<br>software                  | 1mm             | KOLD       |
| Kim et al,<br>2015 <sup>47</sup>             | 167        | 64.8<br>(8.2) |             |  | -950HU | Correlation<br>coefficient                                 | not mentioned                                      | not mentioned                         | 0.75mm          | usual care |
| Koyama et<br>al, 2010 <sup>48</sup>          | 25 (60)    | 67.6          |             |  | -950HU | Correlation<br>coefficient                                 | FC51                                               | doesn't specify                       | 0.5mm           | usual care |
| Koyama et<br>al, 2012 <sup>49</sup>          | 56 42      | 70.2 (8)      | 68.9 (19.6) |  | -950HU | Correlation<br>coefficient                                 | FC13                                               | MATLAB                                | 1mm             | usual care |

|                                         |           |            |             |             |        |                                                                        |                                                                 |                   |           |            |
|-----------------------------------------|-----------|------------|-------------|-------------|--------|------------------------------------------------------------------------|-----------------------------------------------------------------|-------------------|-----------|------------|
|                                         |           |            |             |             |        |                                                                        |                                                                 |                   |           |            |
| Kurashima, K. et al 2013 <sup>50</sup>  | 70        |            |             |             | -960HU | Correlation coefficient                                                | from ultrahigh resolution (UHR) CT and noise reduction software | iDose             | 0.67mm    | SCGOR      |
| Kurashima, K. et al, 2015 <sup>51</sup> | 62 (100)  | 70.8 (6.4) | 62.9 (30.7) |             | -960HU | Correlation coefficient                                                | Interactive reconstruction algorithm                            | Brilliance        | 0.67mm    | Usual care |
| Lee, J. H. et al 2010 <sup>52</sup>     | 145 (98%) | 66 (7)     | 47 (16)     | 78 (27)     | -950HU |                                                                        | reconstruction algorithm B                                      | in house software | 1mm       | KOLD       |
| Lee, J. S. et al 2012 <sup>53</sup>     | 101 (92%) | 65.5 (6.9) | 50 (15.5)   | 75.7 (32.8) | -950HU | multi-variable linear regression and Pearson's correlation coefficient | reconstruction algorithm B                                      | in house software | 0.625-0.8 | KOLD       |

|                                          |              |                   |             |             |        |                                                                                   |                            |                   |                                          |            |
|------------------------------------------|--------------|-------------------|-------------|-------------|--------|-----------------------------------------------------------------------------------|----------------------------|-------------------|------------------------------------------|------------|
|                                          |              |                   |             |             |        |                                                                                   |                            |                   |                                          |            |
| Lee, J. S. et al, 2011 <sup>54</sup>     | 126 (98%)    | 65.5 (7.6)        | 47.9 (14.1) | 74.6 (25.8) | -950HU | multiple, stepwise linear regression models and Pearson's correlation coefficient | reconstruction algorithm B | in house software | 1mm                                      | KOLD       |
| Lutchmedial et al, 2015 <sup>55</sup>    | 274 (55)     | 66.9 (10.4)       | 50 (19)     |             | -950HU | Correlation coefficient                                                           | not mentioned              | not mentioned     | Sub-mm, high spatial frequency algorithm | usual care |
| Martinez, C. H. et al 2012 <sup>56</sup> | 1179 (53.3%) | 65.0 (47.9, 70.6) |             |             | -950HU |                                                                                   |                            |                   | not mentioned                            | COPDGene   |
| Martinez, F. J. et al,                   | 609          | 66.7 (5.9)        | 26.7 (7)    | 28.4 (9.7)  | -950HU | Hazard Ratio                                                                      | standard reconstruction    | custom built      |                                          | NETT       |



|                                                   |           |               |             |          |        |                            |                                               |                                                                      |      |                                                      |
|---------------------------------------------------|-----------|---------------|-------------|----------|--------|----------------------------|-----------------------------------------------|----------------------------------------------------------------------|------|------------------------------------------------------|
| 2006 <sup>57</sup>                                |           |               |             |          |        |                            | kernel                                        |                                                                      |      |                                                      |
| Martinez, F.<br>J. et al, 2007<br><sup>58</sup>   | 1053 (61) | 66 (6)        | 27 (7)      | 28 (9.6) | -950HU |                            | not mentioned                                 | custom built<br>software,<br>pulmonary<br>analysis software<br>suite | 5mm  | NETT                                                 |
| Matsuoka, S.<br>et al, 2007 <sup>59</sup>         | 32 (87)   | 72.8<br>(8.2) | 56.2 (26.9) |          | -950HU | Correlation<br>coefficient | not mentioned                                 | ImageJ                                                               | 2mm  | usual care                                           |
| McAllister,<br>D. A. et al,<br>2014 <sup>60</sup> | 521 (51)  | 68 (6)        | 76 (23)     |          | -910HU | Multilinear<br>analysis    | B50f                                          | Not mentioned                                                        | 10mm | NLCST                                                |
| Mets, O. M.<br>et al, 2011 <sup>61</sup>          | 1140      | 62.5<br>(5.2) | 94.8 (17.6) |          | -950HU | Multivariate<br>analysis   | smooth<br>reconstruction<br>filter (B filter) |                                                                      | 1    | Dutch and Belgian<br>Lung Cancer<br>Screening Trial. |
| Mets, O. M.<br>et al, 2013 <sup>62</sup>          | 442       | 61.3<br>(5.5) | 96.5 (18)   |          | -950HU | Multivariate<br>analysis   | soft<br>reconstruction                        | in house<br>software                                                 | 1mm  | NELSON                                               |

|                                                              |            |               |             |  |                                      |                                                            |                                         |                      |     |             |
|--------------------------------------------------------------|------------|---------------|-------------|--|--------------------------------------|------------------------------------------------------------|-----------------------------------------|----------------------|-----|-------------|
|                                                              |            |               |             |  |                                      |                                                            | filter (B30f)                           |                      |     |             |
| Mohamed<br>Hoesein, F.<br>A. A. et al<br>2013 <sup>63</sup>  | 3670 (100) | 59.8<br>(5.4) |             |  | -<br>910HU,<br>-950HU<br>and<br>PD15 |                                                            |                                         |                      |     | from NELSON |
| Mohamed<br>Hoesein, F.<br>A. A. et al,<br>2011 <sup>64</sup> | 522 (100)  | 60.1<br>(5.4) | 97.6 (18.2) |  | PD15                                 | Multivariate<br>analysis and<br>correlation<br>coefficient | soft<br>reconstruction<br>filter (B30f) | in house<br>software | 1mm | NELSON      |
| Mohamed<br>Hoesein, F.<br>A. A. et al,<br>2011 <sup>65</sup> | 2085 (100) | 59.8<br>(5.3) |             |  | PD15                                 | Multivariate<br>analysis                                   | B30f                                    | in house<br>software | 1   | NELSON      |
| Mohamed<br>Hoesein, F.                                       | 2003 (100) | 59.8          | 98.5 (18.5) |  | PD15                                 | Multivariate                                               | soft<br>reconstruction                  | in house             | 1mm | NELSON      |

|                                                              |            |                |             |  |                       |                          |                                         |                      |       |                              |
|--------------------------------------------------------------|------------|----------------|-------------|--|-----------------------|--------------------------|-----------------------------------------|----------------------|-------|------------------------------|
| A. A. et al,<br>2012 <sup>66</sup>                           |            | (5.3)          |             |  |                       | analysis                 | filter (B30f)                           | software             |       |                              |
| Mohamed<br>Hoesein, F.<br>A. A. et al,<br>2012 <sup>67</sup> | 587 (100)  |                | 97.7 (18.1) |  | PD15                  | Multivariate<br>analysis | soft<br>reconstruction<br>filter (B30f) | in house<br>software | 1mm   | NELSON                       |
| Mohamed<br>Hoesein, F.<br>A. A. et al,<br>2013 <sup>68</sup> | 1108 (100) | 60.4<br>(19.9) | 94.8 (17.6) |  | -950HU<br>and<br>PD15 | Multivariate<br>analysis | soft<br>reconstruction<br>filter (B30f) | in house<br>software | 1mm   | NELSON                       |
| Mohamed<br>Hoesein, F.<br>A. A. et al,<br>2015 <sup>69</sup> | 2021 (100) | 59.8<br>(5.3)  |             |  | PD15                  | Multivariate<br>analysis | B30f                                    | Cirrus Lung<br>12.03 | 1.0mm | nelson                       |
| Mohamed<br>Hoesein, F.<br>A. et al,                          |            | 62.5<br>(5.2)  | 94.8 (17.6) |  | -950HU                | Multivariate<br>analysis | smooth<br>reconstruction<br>kernel      | Cirrus               | 1mm   | nelson trial,<br>prospective |

|                                         |          |            |              |  |                         |                                                   |                                          |                                       |                    |            |
|-----------------------------------------|----------|------------|--------------|--|-------------------------|---------------------------------------------------|------------------------------------------|---------------------------------------|--------------------|------------|
| 2014 <sup>70</sup>                      |          |            |              |  |                         |                                                   |                                          |                                       |                    |            |
| Motohashi, N. et al, 2009 <sup>71</sup> | 125 (89) | 71 (8)     | 51.5 (17.8)  |  | -940HU                  | Correlation coefficient                           |                                          |                                       | 1.25mm collimation |            |
| Nakano, Y. et al, 1999 <sup>72</sup>    | 73 (100) | 68.7 (6.2) | 46.1 (19.5)  |  | -960HU                  | Correlation coefficient                           | high resolution reconstruction algorithm | C Programming language (Symantec C++) | 2mm                | usual care |
| Nakano, Y. et al, 2000 <sup>73</sup>    | 114      | 68 (9)     | 48 (28)      |  | -960HU                  | Correlation coefficient                           | lung algorithm (FC 83)                   | C Programming language (Symantec C++) | 2mm                | usual care |
| Nambu et al, 2015 <sup>74</sup>         | 199 (50) | 64.1 (8.4) | 51.27 (23.1) |  | -910HU, -950HU and PD15 | Multivariate analysis and correlation coefficient | not mentioned                            | VIDA Diagnostics                      | 0.625mm            | COPDGene   |

|                                            |           |             |               |               |        |                         |                          |                                                                              |     |               |
|--------------------------------------------|-----------|-------------|---------------|---------------|--------|-------------------------|--------------------------|------------------------------------------------------------------------------|-----|---------------|
|                                            |           |             |               |               |        |                         |                          |                                                                              |     |               |
| Nishio, M. et al, 2014 <sup>75</sup>       | 30 (83.3) | 70.1 (12.2) | 65.3 (20.6)   | 66.1 (23.6)   | -900HU | Correlation coefficient | standard kernel<br>FC 13 | in house<br>prototype<br>software                                            | 1mm | not mentioned |
| O'Donnell, R. A. et al, 2004 <sup>76</sup> | 65        | 55 (7)      | 56 (16)       | 56 (16)       | -950HU | Correlation coefficient | not mentioned            | not mentioned                                                                | 1mm | usual care    |
| Ogawa, E. et al, 2009 <sup>77</sup>        | 239 (100) | 71 (7)      | 46 (18)       |               | -960HU | Correlation coefficient | lung algorithm<br>(FC38) | custom software<br>written in C<br>programming<br>language<br>(Symantec C++) | 2mm | usual care    |
| Orlandi et al 2005 <sup>78</sup>           | 42 (88)   | 63          | 49.09 (19.44) | 67.57 (24.69) | -950HU | Correlation coefficient | not mentioned            | Pulmo                                                                        | 1mm | usual care    |
| Orlandi et al, 2004 <sup>79</sup>          | 11 (81)   | 68          |               |               | -950HU | Correlation coefficient | not mentioned            | Pulmo                                                                        | 1mm | usual care    |

|                                          |           |                |                 |                |                                    |                                                            |                                                  |                                                         |        |                                                          |
|------------------------------------------|-----------|----------------|-----------------|----------------|------------------------------------|------------------------------------------------------------|--------------------------------------------------|---------------------------------------------------------|--------|----------------------------------------------------------|
| Paoletti, M.<br>et al 2015 <sup>80</sup> | 169 (61)  | 66 (8)         | 54.1 (21.4)     | 69.6<br>(22.5) | -950HU                             | Multivariate<br>analysis and<br>correlation<br>coefficient | B31f                                             | Pulmonary<br>Workstation<br>Apollo. VIDA<br>diagnostics | 0.75mm | usual care                                               |
| Park, M. J.<br>et al 2014 <sup>81</sup>  | 98 (100)  |                |                 |                | -950HU                             |                                                            |                                                  |                                                         |        | retrospectively<br>recruited                             |
| Parr et al,<br>2004 <sup>82</sup>        | 100       | 52 (10.2)      |                 |                | -950HU                             | Correlation<br>coefficient                                 | smooth filter                                    | Pulmo                                                   | 5mm    | ADAPT                                                    |
| Parr, D. G.<br>et al 2009 <sup>83</sup>  | 77 (53%)  | 55 (9)         | 46.5 (20)       | 51.5 (17)      | PD15,<br>mld,<br>910 and<br>-950HU | mITT and<br>sensitivity ratios                             | not mentioned ?on<br>supplemental<br>information | Pulmo                                                   | 5mm    | alpha one<br>registries from<br>Demark, UK and<br>Sweden |
| Pauls et al,<br>2010 <sup>84</sup>       | 474       | 60.4<br>(14.9) | 60.7<br>(20.27) |                | -950HU                             | Correlation<br>coefficient                                 | not mentioned                                    | "Lung<br>Emphysema"<br>application                      | 2mm    | usual care                                               |
| Rambod, M.                               | 2256 (52) | 61.3           | 88.1 (24.3)     | 56.5           | -950HU                             |                                                            |                                                  |                                                         | 1mm    | COPDGene                                                 |

|                                                   |            |                |             |                |                       |                                                            |                    |                                       |                          |                                      |
|---------------------------------------------------|------------|----------------|-------------|----------------|-----------------------|------------------------------------------------------------|--------------------|---------------------------------------|--------------------------|--------------------------------------|
| et al 2012 <sup>85</sup>                          |            | (9.3)          |             | (21.5)         |                       |                                                            |                    |                                       |                          |                                      |
| Roth, M. D.<br>et al, 2006 <sup>86</sup>          | 148 (58.1) | 65.8<br>(7.45) | 42.5 (13.7) | 37.1 (12)      | -910HU                | ANOVA, chi<br>square                                       |                    |                                       |                          | from five<br>university<br>hospitals |
| Saitoh et al,<br>2000 <sup>87</sup>               | 50         | 68 (6)         | 54.9 (21.5) | 66.4<br>(17.6) | -950HU                | Correlation<br>coefficient                                 | Bone algorithm     | a density mask<br>program'            | 10mm                     | usual care                           |
| Sandek, K.<br>et al, 2002 <sup>88</sup>           | 20 (40)    | 60 (8)         | 38.2 (15.5) | 43.6 (23)      | -910HU                | Correlation<br>coefficient                                 | not mentioned      | density mask-not<br>specific software | 1.5mm                    | usual care                           |
| Schroeder, J.<br>D. et al,<br>2013 <sup>89</sup>  | 4062 (55)  | 60.8           |             |                | -950HU<br>and<br>PD15 | Multivariate<br>analysis and<br>correlation<br>coefficient | B31f               | Pulmonary<br>Workstation              | 0.625,<br>0.75,<br>0.9mm | COPDGene                             |
| Schwaiblmai<br>r, M. et al,<br>1998 <sup>90</sup> | 21 (61.9)  | 48 (2)         | 44.7 (3.3)  | 55.3<br>(4.1)  | -950HU                | Correlation<br>coefficient                                 | not mentioned      | not mentioned                         | 1mm                      | usual care                           |
| Shaker, S. B.                                     | 254 (58%)  | 63.6 (7)       | 52 (11)     |                | PD15                  | mixed effects                                              | low spatial (soft) | Pulmo                                 | 10mm                     | from OPA and                         |

|                                            |           |                |             |           |                       |                                                                   |                                    |       |                  |                           |
|--------------------------------------------|-----------|----------------|-------------|-----------|-----------------------|-------------------------------------------------------------------|------------------------------------|-------|------------------|---------------------------|
| et 2009 <sup>91</sup>                      |           |                |             |           |                       | regression model                                                  | frequency                          |       |                  | local newspapers          |
| Shaker, S. B.<br>et al 2009 <sup>92</sup>  | 184 (59)  | 64.9<br>(7.1)  | 53 (13)     | 59 (17)   | -910HU                | Correlation<br>coefficient                                        | soft algorithm                     | pulmo | 5mm              | usual care                |
| Shaker, S. B.<br>et al, 2005 <sup>93</sup> | 42 (38)   | 63 (7)         | 48 (13)     | 49 (16)   | PD15                  | Correlation<br>coefficient                                        | low spatial<br>resolution (soft)   | Pulmo | 5mm              |                           |
| Stolk, J. et al<br>2012 <sup>94</sup>      | 227 (72%) | 54 (8.7)       | 46.6 (16.7) | 48 (14.8) | PD15                  | ANCOVA, Least<br>mean squares, ITT,<br>correlation<br>coefficient | not mentioned                      | Pulmo | not<br>mentioned | From 10 AAT<br>registries |
| Stolk, J. et<br>al, 2003 <sup>95</sup>     | 22 (45)   | 40.7<br>(9.2)  | 56 (32)     |           | -950HU<br>and<br>PD15 | Correlation<br>coefficient                                        |                                    |       |                  |                           |
| Stolk, J. et<br>al, 2007 <sup>96</sup>     | 87 (50.6) | 58.6<br>(10.4) | 50.2 (19.2) |           | PD15                  | Multivariate<br>analysis and<br>correlation                       | smooth<br>reconstruction<br>filter | pulmo | 5mm              | advertisement             |



|                                           |           |                |                  |  |                           | coefficient                      |                     |                 |               |                                |
|-------------------------------------------|-----------|----------------|------------------|--|---------------------------|----------------------------------|---------------------|-----------------|---------------|--------------------------------|
| Sverzellati, N. et al, 2012 <sup>97</sup> | 1159 (68) | 57.5 (6)       | 97.1 (19.6)      |  | -950HU                    | Multivariate logistic regression | B30f                | MevisPULMO      | 5mm           | MILD                           |
| Tanabe, N. et al 2012 <sup>98</sup>       | 53 (48)   | 65.5 (62-72.3) | 71.2 (53.8-81.5) |  | -960HU                    | Multivariate analysis            | FC56 (sharp kernel) | custom designed | 5mm           | kyoto university ongoing study |
| Tanabe, N. et al, 2011 <sup>99</sup>      | 60 (93)   | 73 (68.3-77.8) | 50.6 (38.2-61.1) |  | -910HU, -930HU and -960HU | Multivariate analysis            | Not mentioned       | Not mentioned   | 0.5mm         | Kyoto                          |
| Tanabe, N. et al, 2013 <sup>100</sup>     | 131 (100) | 70.7 (8.8)     | 57.9 (19.8)      |  | -960HU                    | Multivariate analysis            | not mentioned       | not mentioned   | not mentioned |                                |

|                                            |           |              |             |             |        |                                                   |                               |               |         |                                                    |
|--------------------------------------------|-----------|--------------|-------------|-------------|--------|---------------------------------------------------|-------------------------------|---------------|---------|----------------------------------------------------|
| Timmins, S. C. et al, 2012 <sup>101</sup>  | 26 (61.5) | 69.6 (55-85) | 64.8 (19.8) | 50.7 (15.8) | -910HU | Multivariate analysis and correlation coefficient | lung reconstruction algorithm | osiriX        | 1.25    | volunteer database and advertisements in newspaper |
| Tsushima, K. et al, 2010 <sup>102</sup>    | 48        | 61.1 (9.3)   | 77.5 (19.2) |             | -960HU | Correlation coefficient                           | not mentioned                 | not mentioned | 5mm     | lung screening cohort                              |
| Van der Lee et al, 2009 <sup>103</sup>     | 263       | 60.3 (5.4)   | 97.7 (16.8) | 87.4 (16.1) | -950HU | Correlation coefficient                           | not mentioned                 | not mentioned | 1mm     | usual care                                         |
| Vijayaratha, K. et al, 2012 <sup>104</sup> | 21 (81)   | 52.5 (2.1)   | 38.4 (3.1)  |             | PD15   | Multivariate analysis                             | Not mentioned                 | Pulmo         | 5mm     | ADAPT                                              |
| Wang et al                                 | 46(80.4)  | 67           | 72.56       | 69.38       | -950HU | Correlation                                       | standard                      | Thoracic VCAR | 0.625mm | usual care                                         |

|                                         |             |               |             |               |        |                            |                                                                            |                                         |         |                                       |
|-----------------------------------------|-------------|---------------|-------------|---------------|--------|----------------------------|----------------------------------------------------------------------------|-----------------------------------------|---------|---------------------------------------|
| 2015 <sup>105</sup>                     |             | (10.84)       | (31.15)     | (25.39)       |        | coefficient                | algorithm                                                                  | software                                |         |                                       |
| Wang et al,<br>2013 <sup>106</sup>      | 573 (36.6)  | 63.9<br>(5.4) | 74.8 (28.5) |               | -950HU | Correlation<br>coefficient | bone kernel, due<br>to its ability to<br>analyse airways<br>and parenchyma | in house<br>software                    | 0.625mm | SCGOR                                 |
| Washko et<br>al, 2008 <sup>107</sup>    | 1094 (60.9) | 67 (6.2)      | 26.9 (7.2)  | 28.5<br>(9.7) | -950HU | Correlation<br>coefficient | lung algorithm                                                             | Pulmonary<br>Analysis<br>Software Suite | 5-8mm   | NETT                                  |
| Xia et al,<br>2014 <sup>108</sup>       | 51(100)     |               |             |               | -950HU | Correlation<br>coefficient | not mentioned                                                              | extended<br>brilliance<br>workspace     | 1mm     | usual care                            |
| Yamashiro<br>et al, 2010 <sup>109</sup> | 46 (56.5)   | 67.7<br>(7.9) | 57.9 (24.6) |               | -950HU | Correlation<br>coefficient | bone algorithm                                                             | Airway Inspector                        | 1.25mm  | lung tissue<br>research<br>consortium |
| Yuan, R. et                             | 143 (53)    | 59.5          | 99.4 (12.8) |               | -950HU | Multivariate               | Standard                                                                   | custom software                         | 1 and   | British Columbia                      |

|                         |  |       |  |  |  |          |                                                                                 |            |        |                                                          |
|-------------------------|--|-------|--|--|--|----------|---------------------------------------------------------------------------------|------------|--------|----------------------------------------------------------|
| al, 2009 <sup>110</sup> |  | (6.4) |  |  |  | analysis | reconstruction<br>kernel in 36 cases<br>(25%) and B35f<br>in 107 cases<br>(75%) | (Emphylxl) | 1.25mm | Cancer Agency<br>(lung cancer<br>screening<br>programme) |
|-------------------------|--|-------|--|--|--|----------|---------------------------------------------------------------------------------|------------|--------|----------------------------------------------------------|

Table S4. Full risk of bias table

| Author, Year                          | Patient Selection | Index and Reference Test | Flow and Timing | Reporting |
|---------------------------------------|-------------------|--------------------------|-----------------|-----------|
| Nakano, Y. et al, 2000                | high              | medium                   | high            | high      |
| Wang et al 2015                       | low               | medium                   | high            | high      |
| Chapman, K. R. et al 2015             | low               | medium                   | high            | high      |
| Koyama et al, 2012                    | low               | high                     | medium          | high      |
| Schroeder, J. D. et al, 2013          | low               | medium                   | low             | high      |
| Castaldi, P. J. et al, 2013           | low               | medium                   | low             | high      |
| Dijkstra, A. E. et al, 2013           | low               | medium                   | low             | high      |
| Bernspang, E. et al, 2011             | low               | medium                   | low             | high      |
| Haruna, A. et al, 2010                | low               | medium                   | low             | high      |
| Diaz, A. A. et al, 2010               | low               | low                      | low             | high      |
| Shaker, S. B. et al, 2005             | high              | medium                   | high            | medium    |
| Stolk, J. et al 2012                  | high              | medium                   | high            | medium    |
| Kim et al, 2010                       | medium            | medium                   | high            | medium    |
| Stolk, J. et al, 2007                 | medium            | medium                   | high            | medium    |
| Johannessen, A. et al, 2013           | low               | medium                   | high            | medium    |
| Garfield et al, 2012                  | low               | medium                   | high            | medium    |
| Pauls et al, 2010                     | low               | medium                   | high            | medium    |
| Mohamed Hoesein, F. A. A. et al, 2011 | low               | low                      | high            | medium    |
| Stolk, J. et al, 2003                 | low               | low                      | high            | medium    |
| Diaz, A. A et al, 2015                | medium            | medium                   | high            | low       |
| Lee, J. S. et al, 2011                | medium            | medium                   | high            | low       |
| Nambu et al, 2015                     | medium            | medium                   | high            | low       |
| Chierakul, N. et al, 2014             | medium            | medium                   | high            | low       |
| Nakano, Y. et al, 1999                | low               | medium                   | high            | low       |
| Lee, J. H. et al 2010                 | low               | medium                   | high            | low       |
| Lutchmedial et al, 2015               | medium            | low                      | high            | low       |
| Haruna, A. et al, 2010                | low               | low                      | high            | low       |

|                                       |        |        |        |        |
|---------------------------------------|--------|--------|--------|--------|
| Koyama et al, 2010                    | low    | low    | high   | low    |
| Aziz, Z. A. et al, 2005               | low    | low    | high   | low    |
| Nishio, M. et al, 2014                | high   | high   | low    | medium |
| Parr et al, 2004                      | high   | high   | low    | low    |
| Gevenoio, P. A. et al, 1996           | medium | high   | low    | medium |
| Mohamed Hoesein, F. A. A. et al, 2015 | medium | high   | low    | low    |
| Kim et al, 2014                       | high   | medium | medium | low    |
| Saitoh et al, 2000                    | medium | medium | medium | medium |
| Washko et al, 2008                    | medium | medium | medium | medium |
| Diaz et al, 2009                      | low    | medium | medium | medium |
| Matsuoka, S. et al, 2007              | low    | medium | medium | medium |
| Martinez, C. H. et al 2012            | low    | medium | medium | medium |
| Diaz, A. A. et al, 2013               | low    | medium | medium | medium |
| Diaz, A. A. et al, 2012               | low    | medium | medium | medium |
| Roth, M. D. et al, 2006               | low    | medium | medium | medium |
| Kim et al, 2015                       | low    | low    | medium | medium |
| Jung-Wan Yoo et al, 2011              | low    | low    | medium | medium |
| Shaker, S. B. et 2009                 | low    | low    | medium | medium |
| McAllister, D. A. et al, 2014         | medium | medium | low    | medium |
| O'Donnell, R. A. et al, 2004          | medium | medium | low    | medium |
| Dowson, L. J. et al, 2001             | medium | medium | low    | medium |
| Park, M. J. et al 2014                | medium | medium | low    | medium |
| Barjaktarevic, I. et al 2015          | low    | medium | low    | medium |
| Atta et al, 2015                      | low    | medium | low    | medium |
| Mohamed Hoesein, F. A. A. et al, 2012 | low    | medium | low    | medium |
| Han et al, 2011                       | low    | medium | low    | medium |
| Yamashiro et al, 2010                 | low    | medium | low    | medium |
| Desai et al, 2007                     | medium | low    | low    | medium |
| Gietema, H. A. et al, 2013            | low    | low    | low    | medium |

|                                       |        |        |        |        |
|---------------------------------------|--------|--------|--------|--------|
| Tanabe, N. et al 2012                 | low    | low    | low    | medium |
| Chae et al, 2010                      | low    | low    | low    | medium |
| Camiciottoli, G. et al, 2006          | low    | low    | low    | medium |
| Cheng et al, 2015                     | medium | medium | medium | low    |
| Mohamed Hoesein, F. A. A. et al, 2013 | medium | medium | medium | low    |
| Vijayasaritha, K. et al, 2012         | medium | medium | medium | low    |
| Mets, O. M. et al, 2011               | medium | medium | medium | low    |
| Hong, Y. et al, 2012                  | low    | medium | medium | low    |
| Akira et al, 2009                     | low    | medium | medium | low    |
| Baldi et al, 2001                     | low    | medium | medium | low    |
| Gevenois, P. A. et al, 1996           | low    | medium | medium | low    |
| Crim, C. et al, 2011                  | low    | medium | medium | low    |
| Dirksen, A. et al 1999                | low    | medium | medium | low    |
| Paoletti, M. et al 2015               | medium | low    | medium | low    |
| Xia et al, 2014                       | medium | low    | medium | low    |
| Mohamed Hoesein, F. A. A. et al, 2012 | low    | low    | medium | low    |
| Mohamed Hoesein, F. A. A. et al, 2011 | low    | low    | medium | low    |
| De Torres, J. P. et al, 2011          | low    | low    | medium | low    |
| Huessel et al, 2009                   | low    | low    | medium | low    |
| Orlandi et al, 2004                   | low    | low    | medium | low    |
| Atta et al, 2015                      | medium | medium | low    | low    |
| Mohamed Hoesein, F. A. et al, 2014    | medium | medium | low    | low    |
| Coxson, H. O. et al, 2013             | low    | medium | low    | low    |
| Mets, O. M. et al, 2013               | low    | medium | low    | low    |
| Motohashi, N. et al, 2009             | low    | medium | low    | low    |
| Shaker, S. B. et al 2009              | low    | medium | low    | low    |
| Ogawa, E. et al, 2009                 | low    | medium | low    | low    |
| Dawkins, P. et al, 2009               | low    | medium | low    | low    |
| Martinez, F. J. et al, 2006           | low    | medium | low    | low    |

|                                      |        |        |     |     |
|--------------------------------------|--------|--------|-----|-----|
| Orlandi et al 2005                   | low    | medium | low | low |
| Rambod, M. et al 2012                | low    | medium | low | low |
| Albert, P. et al 2012                | low    | medium | low | low |
| Mohamed Hoesein, F. A. A. et al 2013 | low    | medium | low | low |
| Martinez, F. J. et al, 2007          | low    | medium | low | low |
| Chen et al, 2014                     | medium | low    | low | low |
| Schwaiblmair, M. et al, 1998         | medium | low    | low | low |
| Camiciottoli, G. et al, 2012         | medium | low    | low | low |
| Kurashima, K. et al, 2015            | medium | low    | low | low |
| Nishio et al, 2014                   | medium | low    | low | low |
| Kurashima, K. et al 2013             | low    | low    | low | low |
| Tanabe, N. et al, 2013               | low    | low    | low | low |
| Wang et al, 2013                     | low    | low    | low | low |
| Timmins, S. C. et al, 2012           | low    | low    | low | low |
| Sverzellati, N. et al, 2012          | low    | low    | low | low |
| Tanabe, N. et al, 2011               | low    | low    | low | low |
| Tsushima, K. et al, 2010             | low    | low    | low | low |
| Grydeland, T. B. et al, 2010         | low    | low    | low | low |
| Yuan, R. et al, 2009                 | low    | low    | low | low |
| Bastarrika, G. et al, 2009           | low    | low    | low | low |
| Van der Lee et al, 2009              | low    | low    | low | low |
| Sandek, K. et al, 2002               | low    | low    | low | low |
| Agusti, A. et al, 2010               | low    | low    | low | low |
| Diaz, A. A. et al 2010               | low    | low    | low | low |
| Dirksen, A. et al 2009               | low    | low    | low | low |
| Parr, D. G. et al 2009               | low    | low    | low | low |
| Lee, J. S. et al 2012                | low    | low    | low | low |



## References

1. Agusti A, Calverley PMA, Celli B, et al. Characterisation of COPD heterogeneity in the ECLIPSE cohort. *Respiratory Research* 2010; **11**(122).
2. Akira M, Toyokawa K, Inoue Y, Arai T. Quantitative CT in chronic obstructive pulmonary disease: inspiratory and expiratory assessment. *AJR Am J Roentgenol* 2009; **192**(1): 267-72.
3. Albert P, Agusti A, Edwards L, et al. Bronchodilator responsiveness as a phenotypic characteristic of established chronic obstructive pulmonary disease. *Thorax* 2012; **67**(8): 701-8.
4. Atta H, Seifeldin GS, Rashad A, Elmorshidy R. Quantitative validation of the severity of emphysema by multi-detector CT. *Egyptian Journal of Radiology and Nuclear Medicine* 2015; **46**(2): 355-61.
5. Aziz ZA, Wells AU, Desai SR, et al. Functional impairment in emphysema: contribution of airway abnormalities and distribution of parenchymal disease. *AJR Am J Roentgenol* 2005; **185**(6): 1509-15.
6. Baldi S, Miniati M, Bellina CR, et al. Relationship between extent of pulmonary emphysema by high-resolution computed tomography and lung elastic recoil in patients with chronic obstructive pulmonary disease. *American Journal of Respiratory and Critical Care Medicine* 2001; **164**(4): 585-9.
7. Barjaktarevic I, Springmeyer S, Gonzalez X, Sirokman W, Coxson HO, Cooper CB. Diffusing capacity for carbon monoxide correlates best with tissue volume from quantitative CT scanning analysis. *Chest* 2015; **147**(6): 1485-93.
8. Bastarrika G, Wisnivesky JP, Pueyo JC, et al. Low-dose volumetric computed tomography for quantification of emphysema in asymptomatic smokers participating in an early lung cancer detection trial. *Journal of Thoracic Imaging* 2009; **24**(3): 206-11.
9. Bernspang E, Diaz S, Stoel B, Wollmer P, Sveger T, Piitulainen E. CT lung densitometry in young adults with alpha-1-antitrypsin deficiency. *Respiratory Medicine* 2011; **105**(1): 74-9.
10. Camiciottoli G, Bartolucci M, Maluccio NM, et al. Spirometrically gated high-resolution CT findings in COPD: lung attenuation vs lung function and dyspnea severity. *Chest* 2006; **129**(3): 558-64.
11. Camiciottoli G, Bigazzi F, Bartolucci M, et al. BODE-index, modified BODE-index and ADO-score in chronic obstructive pulmonary disease: Relationship with COPD phenotypes and CT lung density changes. *COPD: Journal of Chronic Obstructive Pulmonary Disease* 2012; **9**(3): 297-304.
12. Castaldi PJ, San Jose Estepar R, Mendoza CS, et al. Distinct quantitative computed tomography emphysema patterns are associated with physiology and function in smokers. *Am J Respir Crit Care Med* 2013; **188**(9): 1083-90.
13. Chae EJ, Seo JB, Song JW, et al. Slope of emphysema index: An objective descriptor of regional heterogeneity of emphysema and an independent determinant of pulmonary function. *American Journal of Roentgenology* 2010; **194**(3): W248-W55.
14. Chapman KR, Burdon JG, Piitulainen E, et al. Intravenous augmentation treatment and lung density in severe alpha1 antitrypsin deficiency (RAPID): a randomised, double-blind, placebo-controlled trial. *Lancet* 2015; **386**(9991): 360-8.
15. Chen H, Chen RC, Guan YB, Li W, Liu Q, Zeng QS. Correlation of pulmonary function indexes determined by low-dose MDCT with spirometric pulmonary function tests in patients with chronic obstructive pulmonary disease. *American Journal of Roentgenology* 2014; **202**(4): 711-8.
16. Cheng T, Wan HY, Cheng QJ, et al. Obvious emphysema on computed tomography during an acute exacerbation of chronic obstructive pulmonary disease predicts a poor prognosis. *Intern Med J* 2015; **45**(5): 517-26.
17. Chierakul N, Phanphongsiri S, Chuaychoo B, Muangman N, Totanarungroj K. Relationship between emphysema quantification and COPD severity. *Journal of the Medical Association of Thailand* 2014; **97**(12): 1290-5.
18. Coxson HO, Dirksen A, Edwards LD, et al. The presence and progression of emphysema in COPD as determined by CT scanning and biomarker expression: A prospective analysis from the ECLIPSE study. *The Lancet Respiratory Medicine* 2013; **1**(2): 129-36.

19. Crim C, Celli B, Edwards LD, et al. Respiratory system impedance with impulse oscillometry in healthy and COPD subjects: ECLIPSE baseline results. *Respiratory Medicine* 2011; **105**(7): 1069-78.
20. Dawkins P, Wood A, Nightingale P, Stockley R. Mortality in alpha-1-antitrypsin deficiency in the United Kingdom. *Respir Med* 2009; **103**(10): 1540-7.
21. De Torres JP, Bastarrika G, Zagaceta J, et al. Emphysema presence, severity, and distribution has little impact on the clinical presentation of a cohort of patients with mild to moderate COPD. *Chest* 2011; **139**(1): 36-42.
22. Desai SR, Hansell DM, Walker A, MacDonald SLS, Chabat F, Wells AU. Quantification of emphysema: A composite physiologic index derived from CT estimation of disease extent. *European Radiology* 2007; **17**(4): 911-8.
23. Diaz S, Casselbrant I, Piitulainen E, et al. Validity of apparent diffusion coefficient hyperpolarized <sup>3</sup>He-MRI using MSCT and pulmonary function tests as references. *European Journal of Radiology* 2009; **71**(2): 257-63.
24. Diaz AA, Pinto-Plata V, Hernandez C, et al. Emphysema and DLCO predict a clinically important difference for 6MWD decline in COPD. *Respiratory Medicine* 2015; **109**(7): 882-9.
25. Diaz AA, Valim C, Yamashiro T, et al. Airway count and emphysema assessed by chest CT imaging predicts clinical outcome in smokers. *Chest* 2010; **138**(4): 880-7.
26. Diaz AA, Bartholmai B, San Jose Estepar R, et al. Relationship of emphysema and airway disease assessed by CT to exercise capacity in COPD. *Respir Med* 2010; **104**(8): 1145-51.
27. Diaz AA, Come CE, Ross JC, et al. Association between airway caliber changes with lung inflation and emphysema assessed by volumetric CT scan in subjects with COPD. *Chest* 2012; **141**(3): 736-44.
28. Diaz AA, Han MK, Come CE, et al. Effect of emphysema on CT scan measures of airway dimensions in smokers. *Chest* 2013; **143**(3): 687-93.
29. Dijkstra AE, Postma DS, ten Hacken N, et al. Low-dose CT measurements of airway dimensions and emphysema associated with airflow limitation in heavy smokers: A cross sectional study. *Respiratory Research* 2013; **14**(1).
30. Dirksen A, Dijkman JH, Madsen F, et al. A randomized clinical trial of alpha1-antitrypsin augmentation therapy. *American Journal of Respiratory and Critical Care Medicine* 1999; **160**(5): 1468-72.
31. Dirksen A, Piitulainen E, Parr DG, et al. Exploring the role of CT densitometry: A randomised study of augmentation therapy in alpha1-antitrypsin deficiency. *European Respiratory Journal* 2009; **33**(6): 1345-53.
32. Dowson LJ, Guest PJ, Hill SL, Holder RL, Stockley RA. High-resolution computed tomography scanning in alpha1-antitrypsin deficiency: Relationship to lung function and health status. *European Respiratory Journal* 2001; **17**(6): 1097-104.
33. Garfield JL, Marchetti N, Gaughan JP, Steiner RM, Criner GJ. Total lung capacity by Plethysmography and high-resolution computed tomography in COPD. *International Journal of COPD* 2012; **7**: 119-26.
34. Gevenois PA, De Vuyst P, Sy M, et al. Pulmonary emphysema: Quantitative CT during expiration. *Radiology* 1996; **199**(3): 825-9.
35. Gevenois PA, De Vuyst P, De Maertelaer V, et al. Comparison of computed density and microscopic morphometry in pulmonary emphysema. *American Journal of Respiratory and Critical Care Medicine* 1996; **154**(1): 187-92.
36. Gietema HA, Edwards LD, Coxson HO, Bakke PS. Impact of emphysema and airway wall thickness on quality of life in smoking-related COPD. *Respiratory Medicine* 2013; **107**(8): 1201-9.
37. Grydeland TB, Dirksen A, Coxson HO, et al. Quantitative computed tomography measures of emphysema and airway wall thickness are related to respiratory symptoms. *Am J Respir Crit Care Med* 2010; **181**(4): 353-9.
38. Han MK, Kazerooni EA, Lynch DA, et al. Chronic obstructive pulmonary disease exacerbations in the COPD Gene study: associated radiologic phenotypes. *Radiology* 2011; **261**(1): 274-82.
39. Haruna A, Muro S, Nakano Y, et al. CT scan findings of emphysema predict mortality in COPD. *Chest* 2010; **138**(3): 635-40.

40. Haruna A, Oga T, Muro S, et al. Relationship between peripheral airway function and patient-reported outcomes in COPD: a cross-sectional study. *BMC Pulmonary Medicine* 2010; **10**(10).
41. Hong Y, Chae EJ, Seo JB, et al. Contributors of the severity of airflow limitation in COPD patients. *Tuberculosis and Respiratory Diseases* 2012; **72**(1): 8-14.
42. Heussel CP, Herth FJF, Kappes J, et al. Fully automatic quantitative assessment of emphysema in computed tomography: Comparison with pulmonary function testing and normal values. *European Radiology* 2009; **19**(10): 2391-402.
43. Johannessen A, Skorge TD, Bottai M, et al. Mortality by level of emphysema and airway wall thickness. *American Journal of Respiratory and Critical Care Medicine* 2013; **187**(6): 602-8.
44. Yoo JW, Hong Y, Seo JB, et al. Comparison of clinico-physiologic and CT imaging risk factors for COPD exacerbation. *Journal of Korean Medical Science* 2011; **26**(12): 1606-12.
45. Kim SS, Seo JB, Lee HY, et al. Chronic Obstructive Pulmonary Disease: Lobe-based Visual Assessment of Volumetric CT by Using Standard Images-Comparison with Quantitative CT and Pulmonary Function Test in the COPDGene Study. *Radiology* 2013; **266**(2): 626-35.
46. Kim EY, Seo JB, Lee HJ, et al. Detailed analysis of the density change on chest CT of COPD using non-rigid registration of inspiration/expiration CT scans. *European Radiology* 2014; **25**(2): 541-9.
47. Kim EY, Seo JB, Lee HJ, et al. Detailed analysis of the density change on chest CT of COPD using non-rigid registration of inspiration/expiration CT scans. *European radiology* 2015; **25**(2): 541-9.
48. Koyama H, Ohno Y, Yamazaki Y, et al. Quantitative and Qualitative Assessments of Lung Destruction and Pulmonary Functional Loss from Reduced-Dose Thin-Section CT in Pulmonary Emphysema Patients. *Academic Radiology* 2010; **17**(2): 163-8.
49. Koyama H, Ohno Y, Nishio M, et al. Three-dimensional airway lumen volumetry: Comparison with bronchial wall area and parenchymal densitometry in assessment of airway obstruction in pulmonary emphysema. *British Journal of Radiology* 2012; **85**(1020): 1525-32.
50. Kurashima K, Hoshi T, Takaku Y, et al. Changes in the airway lumen and surrounding parenchyma in chronic obstructive pulmonary disease. *International Journal of COPD* 2013; **8**: 523-32.
51. Kurashima K, Takaku Y, Hoshi T, et al. Lobe-based computed tomography assessment of airway diameter, airway or vessel number, and emphysema extent in relation to the clinical outcomes of COPD. *International Journal of COPD* 2015; **10**: 1027-33.
52. Lee JH, Lee YK, Kim EK, et al. Responses to inhaled long-acting beta-agonist and corticosteroid according to COPD subtype. *Respiratory Medicine* 2010; **104**(4): 542-9.
53. Lee JS, Huh JW, Chae EJ, et al. Response patterns to bronchodilator and quantitative computed tomography in chronic obstructive pulmonary disease. *Clinical Physiology and Functional Imaging* 2012; **32**(1): 12-8.
54. Lee JS, Ra SW, Chae EJ, et al. Validation of the lower limit of normal diffusing capacity for detecting emphysema. *Respiration* 2011; **81**(4): 287-93.
55. Lutchmedial SM, Creed WG, Moore AJ, Walsh RR, Gentchos GE, Kaminsky DA. How common is airflow limitation in patients with emphysema on CT scan of the chest? *Chest* 2015; **148**(1): 176-84.
56. Martinez CH, Chen YH, Westgate PM, et al. Relationship between quantitative CT metrics and health status and BODE in chronic obstructive pulmonary disease. *Thorax* 2012; **67**(5): 399-406.
57. Martinez FJ, Foster G, Curtis JL, et al. Predictors of mortality in patients with emphysema and severe airflow obstruction. *Am J Respir Crit Care Med* 2006; **173**(12): 1326-34.
58. Martinez FJ, Curtis JL, Sciurba F, et al. Sex differences in severe pulmonary emphysema. *American Journal of Respiratory and Critical Care Medicine* 2007; **176**(3): 243-52.
59. Matsuoka S, Kurihara Y, Yagihashi K, Nakajima Y. Quantitative assessment of peripheral airway obstruction on paired expiratory/inspiratory thin-section computed tomography in chronic obstructive pulmonary disease with emphysema. *J Comput Assist Tomo* 2007; **31**(3): 384-9.
60. McAllister DA, Ahmed FS, Austin JHM, et al. Emphysema Predicts Hospitalisation and Incident Airflow Obstruction among Older Smokers: A Prospective Cohort Study. *Plos One* 2014; **9**(4).

61. Mets OM, Buckens CFM, Zanen P, et al. Identification of chronic obstructive pulmonary disease in lung cancer screening computed tomographic scans. *JAMA - Journal of the American Medical Association* 2011; **306**(16): 1775-81.
62. Mets OM, Schmidt M, Buckens CF, et al. Diagnosis of chronic obstructive pulmonary disease in lung cancer screening Computed Tomography scans: independent contribution of emphysema, air trapping and bronchial wall thickening. *Respiratory research* 2013; **14**: 59.
63. Mohamed Hoesein FA, Zanen P, Jong PA, et al. Rate of progression of CT-quantified emphysema in male current and ex-smokers: a follow-up study. *Respiratory research*, 2013. <http://onlinelibrary.wiley.com/doi/10.1186/1465-2875-174-CN-00874174/frame.html> (accessed 2017)
64. Mohamed Hoesein FAA, Zanen P, Van Ginneken B, Van Klaveren RJ, Lammers JWJ. Association of the transfer coefficient of the lung for carbon monoxide with emphysema progression in male smokers. *European Respiratory Journal* 2011; **38**(5): 1012-8.
65. Mohamed Hoesein FAA, De Hoop B, Zanen P, et al. CT-quantified emphysema in male heavy smokers: Association with lung function decline. *Thorax* 2011; **66**(9): 782-7.
66. Mohamed Hoesein FAA, Zanen P, Boezen HM, et al. Lung function decline in male heavy smokers relates to baseline airflow obstruction severity. *Chest* 2012; **142**(6): 1530-8.
67. Mohamed Hoesein FAA, Van Rikxoort E, Van Ginneken B, et al. Computed tomography-quantified emphysema distribution is associated with lung function decline. *European Respiratory Journal* 2012; **40**(4): 844-50.
68. Mohamed Hoesein FAA, de Jong PA, Lammers JWJ, et al. Computed Tomography Structural Lung Changes in Discordant Airflow Limitation. *PLoS ONE* 2013; **8**(6).
69. Mohamed Hoesein FA, de Jong PA, Lammers JW, et al. Airway wall thickness associated with forced expiratory volume in 1 second decline and development of airflow limitation. *Eur Respir J* 2015; **45**(3): 644-51.
70. Mohamed Hoesein FA, de Jong PA, Lammers JWJ, et al. Contribution of CT quantified emphysema, air trapping and airway wall thickness on pulmonary function in male smokers with and without COPD. *Copd* 2014; **11**(5): 503-9.
71. Motohashi N, Kimura K, Ishii T, et al. Emphysema on imaging is associated with quality of life in elderly patients with chronic obstructive pulmonary disease. *Geriatrics and Gerontology International* 2010; **10**(1): 17-24.
72. Nakano Y, Sakai H, Muro S, et al. Comparison of low attenuation areas on computed tomographic scans between inner and outer segments of the lung in patients with chronic obstructive pulmonary disease: Incidence and contribution to lung function. *Thorax* 1999; **54**(5): 384-9.
73. Nakano Y, Muro S, Sakai H, et al. Computed tomographic measurements of airway dimensions and emphysema in smokers correlation with lung function. *American Journal of Respiratory and Critical Care Medicine* 2000; **162**(3): 1102-8.
74. Nambu A, Zach J, Schroeder J, et al. Relationships between diffusing capacity for carbon monoxide (DLCO), and quantitative computed tomography measurements and visual assessment for chronic obstructive pulmonary disease. *European Journal of Radiology* 2015; **84**(5): 980-5.
75. Nishio M, Matsumoto S, Koyama H, Ohno Y, Sugimura K. Airflow limitation in chronic obstructive pulmonary disease. Ratio and difference of percentage of low-attenuation lung regions in paired inspiratory/expiratory computed tomography. *Academic Radiology* 2014; **21**(10): 1262-7.
76. O'Donnell RA, Peebles C, Ward JA, et al. Relationship between peripheral airway dysfunction, airway obstruction, and neutrophilic inflammation in COPD. *Thorax* 2004; **59**(10): 837-42.
77. Ogawa E, Nakano Y, Ohara T, et al. Body mass index in male patients with COPD: Correlation with low attenuation areas on CT. *Thorax* 2009; **64**(1): 20-5.
78. Orlandi I, Moroni C, Camiciottoli G, et al. Chronic obstructive pulmonary disease: Thin-section CT measurement of airway wall thickness and lung attenuation. *Radiology* 2005; **234**(2): 604-10.
79. Orlandi I, Moroni C, Camiciottoli G, et al. Spirometric-gated computed tomography quantitative evaluation of lung emphysema in chronic obstructive pulmonary disease: A comparison of 3 techniques. *Journal of Computer Assisted Tomography* 2004; **28**(4): 437-42.

80. Paoletti M, Cestelli L, Bigazzi F, Camiciottoli G, Pistolesi M. Chronic obstructive pulmonary disease: Pulmonary function and CT lung attenuation do not show linear correlation. *Radiology* 2015; **276**(2): 571-8.
81. Park MJ, Cho JM, Jeon KN, et al. Mass and Fat Infiltration of Intercostal Muscles Measured by CT Histogram Analysis and Their Correlations with COPD Severity. *Academic Radiology* 2014; **21**(6): 711-7.
82. Parr DG, Stoel BC, Stolk J, Stockley RA. Pattern of emphysema distribution in alpha1-antitrypsin deficiency influences lung function impairment. *Am J Respir Crit Care Med* 2004; **170**(11): 1172-8.
83. Parr DG, Dirksen A, Piitulainen E, Deng C, Wencker M, Stockley RA. Exploring the optimum approach to the use of CT densitometry in a randomised placebo-controlled study of augmentation therapy in alpha 1-antitrypsin deficiency. *Respiratory research*, 2009.  
<http://onlinelibrary.wiley.com/o/cochrane/clcentral/articles/560/CN-00734560/frame.html>  
<http://www.ncbi.nlm.nih.gov/pmc/articles/PMC2740846/pdf/1465-9921-10-75.pdf> (accessed 2017)
84. Pauls S, Gulkin D, Feuerlein S, et al. Assessment of COPD severity by computed tomography: Correlation with lung functional testing. *Clinical Imaging* 2010; **34**(3): 172-8.
85. Rambod M, Porszasz J, Make BJ, et al. Six-minute walk distance predictors, including CT scan measures, in the COPDGene cohort. *Chest* 2012; **141**(4): 867-75.
86. Roth MD, Connett JE, D'Armiento JM, et al. Feasibility of retinoids for the treatment of emphysema study. *Chest* 2006; **130**(5): 1334-45.
87. Saitoh T, Koba H, Shijubo N, Tanaka H, Sugaya F. Lobar distribution of emphysema in computed tomographic densitometric analysis. *Investigative Radiology* 2000; **35**(4): 235-43.
88. Sandek K, Bratel T, Lagerstrand L, Rosell H. Relationship between lung function, ventilation-perfusion inequality and extent of emphysema as assessed by high-resolution computed tomography. *Respiratory Medicine* 2002; **96**(11): 934-43.
89. Schroeder JD, McKenzie AS, Zach JA, et al. Relationships between airflow obstruction and quantitative CT measurements of emphysema, air trapping, and airways in subjects with and without chronic obstructive pulmonary disease. *American Journal of Roentgenology* 2013; **201**(3): W460-W70.
90. Schwaiblmair M, Beinert T, Seemann M, Behr J, Reiser M, Vogelmeier C. Relations between cardiopulmonary exercise testing and quantitative high-resolution computed tomography associated in patients with alpha-1-antitrypsin deficiency. *European journal of medical research* 1998; **3**(11): 527-32.
91. Shaker SB, Dirksen A, Ulrik CS, et al. The effect of inhaled corticosteroids on the development of emphysema in smokers assessed by annual computed tomography. *COPD: Journal of Chronic Obstructive Pulmonary Disease* 2009; **6**(2): 104-11.
92. Shaker SB, Stavngaard T, Hestad M, Bach KS, Tonnesen P, Dirksen A. The extent of emphysema in patients with COPD. *Clin Respir J* 2009; **3**(1): 15-21.
93. Shaker SB, Maltbaek N, Brand P, Haeussermann S, Dirksen A. Quantitative computed tomography and aerosol morphometry in COPD and alpha1-antitrypsin deficiency. *Eur Respir J* 2005; **25**(1): 23-30.
94. Stolk J, Stockley RA, Stoel BC, et al. Randomised controlled trial for emphysema with a selective agonist of the gamma-type retinoic acid receptor. *European Respiratory Journal* 2012; **40**(2): 306-12.
95. Stolk J, Ng WH, Bakker ME, et al. Correlation between annual change in health status and computer tomography derived lung density in subjects with alpha1-antitrypsin deficiency. *Thorax* 2003; **58**(12): 1027-30.
96. Stolk J, Versteegh MIM, Montenijs LJ, et al. Densitometry for assessment of effect of lung volume reduction surgery for emphysema. *European Respiratory Journal* 2007; **29**(6): 1138-43.
97. Sverzellati N, Cademartiri F, Bravi F, et al. Relationship and prognostic value of modified coronary artery calcium score, FEV1, and emphysema in lung cancer screening population: The MILD trial. *Radiology* 2012; **262**(2): 460-7.
98. Tanabe N, Muro S, Sato S, et al. Longitudinal Study of Spatially Heterogeneous Emphysema Progression in Current Smokers with Chronic Obstructive Pulmonary Disease. *PLoS ONE* 2012; **7**(9).

99. Tanabe N, Muro S, Hirai T, et al. Impact of exacerbations on emphysema progression in chronic obstructive pulmonary disease. *American Journal of Respiratory and Critical Care Medicine* 2011; **183**(12): 1653-9.
100. Tanabe N, Muro S, Tanaka S, et al. Emphysema distribution and annual changes in pulmonary function in male patients with chronic obstructive pulmonary disease. *Respiratory research* 2012; **13**: 31.
101. Timmins SC, Diba C, Farrow CE, et al. The relationship between airflow obstruction, emphysema extent, and small airways function in COPD. *Chest* 2012; **142**(2): 312-9.
102. Tsushima K, Sone S, Fujimoto K, et al. Identification of occult parenchymal disease such as emphysema or airway disease using screening computed tomography. *COPD: Journal of Chronic Obstructive Pulmonary Disease* 2010; **7**(2): 117-25.
103. van der Lee I, Gietema HA, Zanen P, et al. Nitric oxide diffusing capacity versus spirometry in the early diagnosis of emphysema in smokers. *Respiratory Medicine* 2009; **103**(12): 1892-7.
104. Vijayasaratha K, Stockley RA. Relationship between frequency, length, and treatment outcome of exacerbations to baseline lung function and lung density in alpha-1 antitrypsin-deficient COPD. *International Journal of COPD* 2012; **7**: 789-96.
105. Wang G, Wang L, Ma Z, Zhang C, Deng K. Quantitative emphysema assessment of pulmonary function impairment by computed tomography in chronic obstructive pulmonary disease. *Journal of Computer Assisted Tomography* 2015; **39**(2): 171-5.
106. Wang Z, Gu S, Leader JK, et al. Optimal threshold in CT quantification of emphysema. *European Radiology* 2013; **23**(4): 975-84.
107. Washko GR, Criner GJ, Mohsenifar Z, et al. Computed tomographic-based quantification of emphysema and correlation to pulmonary function and mechanics. *COPD: Journal of Chronic Obstructive Pulmonary Disease* 2008; **5**(3): 177-86.
108. Xia Y, Guan Y, Fan L, et al. Dynamic contrast enhanced magnetic resonance perfusion imaging in high-risk smokers and smoking-related COPD: correlations with pulmonary function tests and quantitative computed tomography. *Copd* 2014; **11**(5): 510-20.
109. Yamashiro T, Matsuoka S, Bartholmai BJ, et al. Collapsibility of Lung Volume by Paired Inspiratory and Expiratory CT Scans. Correlations with Lung Function and Mean Lung Density. *Academic Radiology* 2010; **17**(4): 489-95.
110. Yuan R, Hogg JC, Pare PD, et al. Prediction of the rate of decline in FEV1 in smokers using quantitative computed tomography. *Thorax* 2009; **64**(11): 944-9.
